# Supplementary material
Source: Springer Nature journal article supplement (https://www.springermedizin.de/resource/supplementary/12936_2007_388_MOESM2_ESM.pdf/9547696)
Supplement: MOESM2 [file 9547696]

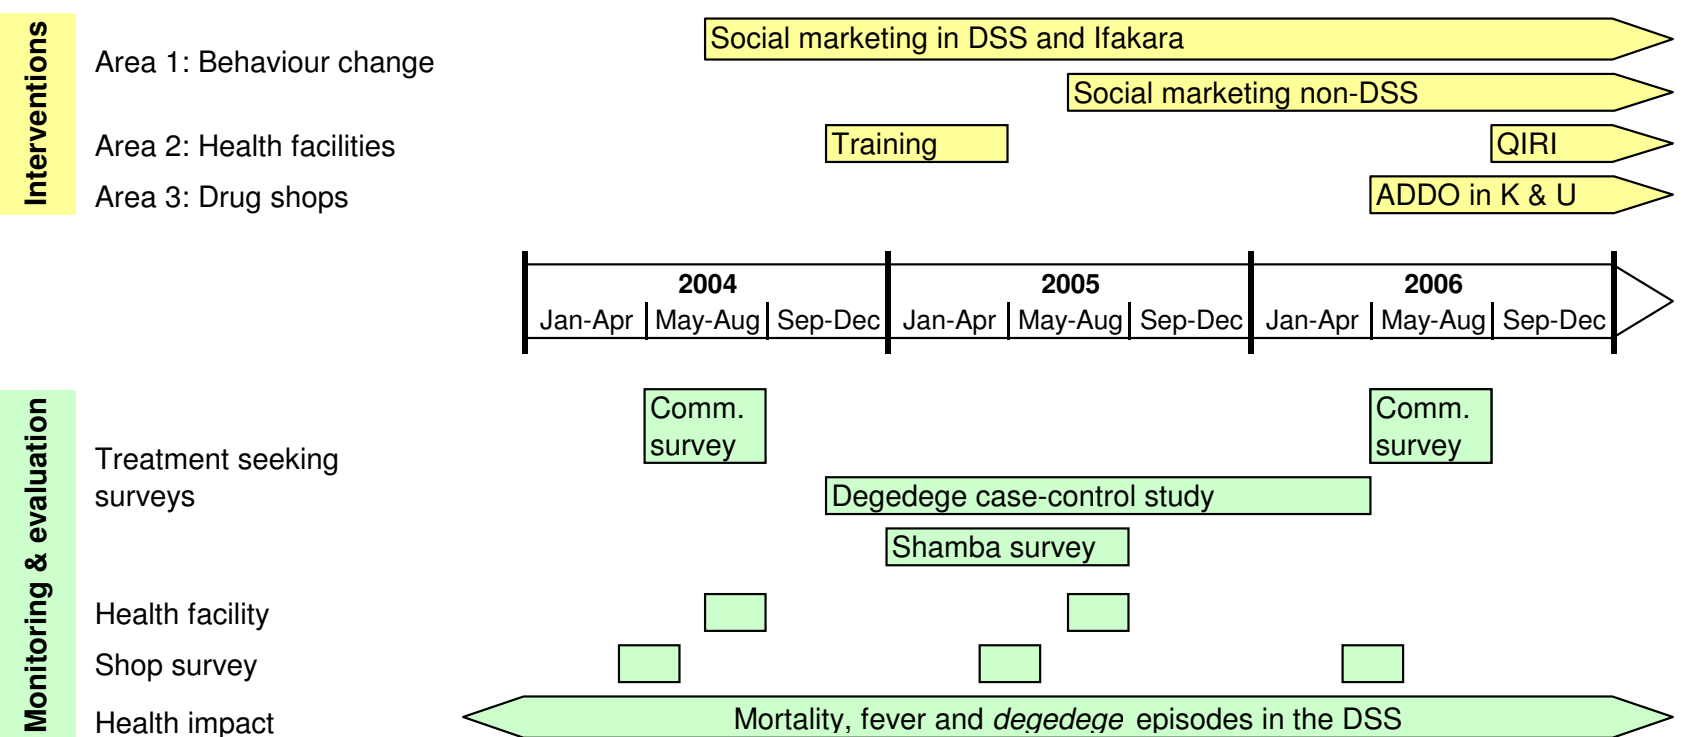

**Legend:**

- DSS = Demographic Surveillance System
- QIRI = Quality Improvement and Recognition Initiative
- ADDO = Accredited Drug-Dispensing Outlets
- K & U = Kilombero and Ulanga districts
- Comm. survey = Cross-sectional community survey
